# Supplementary material for: Biological halogen bonds in protein–ligand complexes: a combined QTAIM and NCIPlot study in four representative cases
Source: Royal Society of Chemistry journal article supplement (doi:10.1039/d1ob01212f), 2021-01-01
Supplement: d1ob01212f1.pdf [file d1ob01212f1.pdf]

## **Biological halogen bonds in protein-ligand complexes: a combined QTAIM and NCIPLOT study in four representative cases**

Antonio Frontera<sup>a,\*</sup> and Antonio Bauzá<sup>a,\*</sup>

*<sup>a</sup>Department of Chemistry, Universitat de les Illes Balears  
Ctra. de Valldemossa km 7.5, 07122 Palma de Mallorca (Spain)  
E-mail: [toni.frontera@uib.es](mailto:toni.frontera@uib.es); [antonio.bauza@uib.es](mailto:antonio.bauza@uib.es)*

**Table S1**  
**Cartesian coordinates of the PDB models**

Page 2  
Page 5

**Table S1.** List of X-ray structures exhibiting biological HaBs with indication of the Ligand and Protein ID, the HaB donor and acceptor counterparts (Interaction), HaB distance (d in Å) and angle (A in °).

| Ligand ID | PDB ID | Interaction                      | d              | A              |
|-----------|--------|----------------------------------|----------------|----------------|
| I7T       | 2Y6Q   | I···S (MET375)                   | 2.831          | 176.6          |
| IMM       | 1PGF   | I···OC(LEU384)                   | 3.748          | 178.9          |
| IRF       | 2J08   | I···OC(GLY342)                   | 3.351          | 166.8          |
| ISF       | 1PGE   | I···OC(LEU384)                   | 3.151          | 177.5          |
| K8Q       | 6RLW   | I···OC(GLY312)                   | 3.431          | 176.2          |
| IZG       | 3PP1   | I···OC(VAL127)                   | 3.298          | 178.1          |
| KON       | 6RZM   | I···OC(GLY182)                   | 3.249          | 165.9          |
| LCJ       | 6NYB   | I···OC(VAL127)                   | 3.607          | 178.4          |
| LSG       | 3MBL   | I···OC(VAL127)                   | 3.252          | 176.2          |
| LUG       | 3EQB   | I···OC(VAL127)                   | 3.081          | 176.7          |
| M15       | 4LB3   | I···O(THR113)                    | 2.947          | 167.1          |
| M3K       | 4ARK   | I···OC(VAL127)                   | 3.439          | 178.0          |
| MEK       | 3DV3   | I···OC(VAL127)                   | 3.147          | 177.2          |
| P96       | 4AGQ   | I···OC(LEU145)                   | 2.978          | 176.0          |
| P74       | 4AGO   | I···OC(LEU145)                   | 3.000          | 174.7          |
| P51       | 4AGP   | I···OC(LEU145)                   | 2.989          | 175.2          |
| NXG       | 4AGN   | I···OC(LEU52)                    | 2.989          | 174.4          |
| PIH       | 3DNA   | I···SeC(MSE102)<br>I···OC(LEU84) | 3.383<br>3.396 | 170.5<br>164.2 |
| PYZ       | 7NQX   | I···OC(THR42)                    | 3.642          | 170.1          |
| Q2J       | 6U99   | I···OC(GLY135)                   | 3.746          | 164.7          |
| Q2A       | 6U9A   | I···OC(GLY135)                   | 3.691          | 161.4          |
| Q2A       | 6U9B   | I···OC(GLY135)                   | 3.818          | 165.6          |
| Q2D       | 6U98   | I···OC(GLY135)                   | 3.617          | 164.5          |
| QOA       | 7M0W   | I···OC(VAL127)                   | 3.561          | 177.1          |
| R22       | 2BE2   | I···OC(TYR188)                   | 3.372          | 168.5          |
| V04       | 3V04   | I···OC(VAL127)                   | 3.311          | 176.3          |
| T3W       | 7B94   | I···OC(VAL127)                   | 3.480          | 175.2          |
| VKD       | 7JUS   | I···OC(VAL127)                   | 3.644          | 168.9          |
| VRA       | 3E8N   | I···OC(VAL127)                   | 3.309          | 176.2          |
| YJ8       | 2YJ8   | I···OC(GLY61)                    | 3.121          | 176.8          |
| YQY       | 4ANB   | I···OC(VAL127)                   | 3.430          | 173.9          |
| 0BT       | 4L6C   | I···OC(ARG163)                   | 3.172          | 171.4          |
| 136       | 1GJD   | I···OC(VAL41)                    | 3.418          | 169.9          |
| 1CX       | 3DY7   | I···OC(VAL127)                   | 3.354          | 178.6          |
| 1WW       | 4LAZ   | I···OC(THR113)                   | 3.031          | 165.6          |
| 21F       | 4LYJ   | I···OC(THR58)                    | 3.276          | 178.3          |
| 21F       | 4LYH   | I···OC(THR58)                    | 3.477          | 174.8          |
| 24I       | 2C6C   | I···OC(ILE456)                   | 3.767          | 165.4          |
| 2P7       | 4AN9   | I···OC(VAL127)                   | 3.777          | 172.2          |
| 33E       | 4TKI   | I···OC(GLY1043)                  | 2.907          | 179.2          |
| 3AC       | 2B5J   | I···OC(TYR188)                   | 3.567          | 169.4          |
| 3BM       | 3EQC   | I···OC(VAL127)                   | 3.113          | 178.4          |
| 3OR       | 3ORN   | I···OC(VAL127)                   | 3.592          | 179.1          |
| 3V0       | 3V01   | I···OC(VAL127)                   | 3.281          | 173.9          |
| 3WH       | 4X21   | I···SC(MET146)                   | 3.051          | 173.1          |
| 42F       | 4XP5   | I···OC(ASP121)                   | 3.273          | 165.9          |

|     |      |                 |       |       |
|-----|------|-----------------|-------|-------|
| 4BM | 7JUJ | I...OC(VAL127)  | 3.543 | 175.4 |
| 4BM | 7JV0 | I...OC(VAL127)  | 3.747 | 169.4 |
| 4BM | 7M0X | I...OC(VAL127)  | 3.173 | 177.4 |
| 4BM | 3EQG | I...OC(VAL127)  | 3.177 | 176.5 |
| 4BM | 3VVH | I...OC(VAL127)  | 3.198 | 177.2 |
| 4O9 | 4LBR | I...OC(THR113)  | 2.933 | 165.6 |
| 573 | 4MNE | I...OC(VAL127)  | 3.423 | 174.0 |
| 5EA | 1S9I | I...OC(VAL131)  | 3.165 | 175.6 |
| 5I5 | 2I6A | I...OC(ILE39)   | 3.282 | 162.1 |
| 5Y0 | 4AN3 | I...OC(VAL127)  | 3.436 | 175.1 |
| 61V | 5HK2 | I...CC(TYR206)  | 3.572 | 165.2 |
| 77D | 3SLS | I...OC(VAL127)  | 3.130 | 174.8 |
| 7FO | 5TMV | I...OC(GLU419)  | 3.175 | 170.8 |
| 7OV | 5U00 | I...OC(TYR827)  | 3.062 | 176.1 |
| 9GH | 5O1I | I...OC(LEU145)  | 2.887 | 175.0 |
| 9GK | 5O1G | I...OC(LEU145)  | 2.919 | 177.1 |
| 9GN | 5O1H | I...OC(LEU145)  | 2.921 | 177.4 |
| 9GO | 5O1F | I...OC(LEU145)  | 2.929 | 177.6 |
| 9GT | 5O1E | I...OC(LEU145)  | 2.913 | 177.5 |
| 9GW | 5O1D | I...OC(LEU145)  | 2.944 | 177.1 |
| 9GZ | 5O1C | I...OC(LEU145)  | 2.873 | 176.5 |
| BBM | 1S9J | I...OC(VAL127)  | 3.134 | 176.1 |
| CZI | 1UHI | I...OC(THR166)  | 3.119 | 174.2 |
| DIZ | 1T4E | I...OC(GLN72)   | 3.085 | 163.9 |
| ELB | 6G3Y | I...OC(GLY312)  | 3.353 | 173.4 |
| EUI | 7JUY | I...OC(VAL127)  | 3.861 | 170.8 |
| FIB | 3DN3 | I...SC(MET102)  | 2.867 | 172.1 |
| FIB | 3DN8 | I...SeC(MSE102) | 2.989 | 173.9 |
| G9J | 6DFN | I...OC(VAL533)  | 3.089 | 173.5 |
| 9H2 | 5O1B | I...OC(LEU145)  | 2.895 | 176.8 |
| 9H5 | 5O1A | I...OC(LEU145)  | 2.867 | 176.9 |
| DIU | 2BXL | I...OC(ARG257)  | 3.469 | 173.3 |
| DIU | 4LUH | I...OC(ASP450)  | 3.499 | 170.2 |
| DIU | 5OSW | I...OC(GLU449)  | 3.814 | 166.2 |
| P84 | 4AGL | I...OC(LEU145)  | 2.980 | 175.3 |
| P86 | 4AGM | I...OC(LEU145)  | 2.967 | 174.4 |
| T2B | 3WGW | I...OC(GLY127)  | 3.069 | 174.1 |
| Y0V | 5AOJ | I...OC(LEU145)  | 2.914 | 172.4 |
| 9ZZ | 5OOH | I...OC(THR177)  | 3.390 | 175.1 |
| A0Z | 6SPW | I...OC(ASP237)  | 2.888 | 175.1 |
| K8X | 3KXN | I...OC(VAL116)  | 2.937 | 168.1 |
| T4A | 1KGI | I...OC(ALA709)  | 3.074 | 164.6 |
| T44 | 4LNX | I...OC(PHE218)  | 3.060 | 176.0 |
| T44 | 1SN0 | I...OC(LEU109)  | 3.295 | 173.7 |
| T44 | 1HK1 | I...OC(ALA406)  | 3.516 | 170.0 |
| T44 | 1F86 | I...OC(SER117)  | 3.660 | 176.3 |
| T44 | 1ICT | I...OC(SER117)  | 3.302 | 171.5 |
| T44 | 1HK2 | I...OC(ALA406)  | 3.720 | 169.2 |
| T44 | 1HK3 | I...OC(ALA406)  | 3.532 | 169.4 |
| T44 | 1ETB | I...OC(THR109)  | 3.227 | 168.5 |
| T44 | 2CEO | I...OC(GLU377)  | 3.793 | 162.1 |
| T44 | 1IE4 | I...OC(ALA109)  | 3.071 | 167.0 |
| T44 | 5MHE | I...OC(MET111)  | 3.700 | 164.8 |

|     |      |                |       |       |
|-----|------|----------------|-------|-------|
| 4HY | 2QPY | I···CC(TYR834) | 3.631 | 174.7 |
| 4HY | 3D57 | I···OC(PHE272) | 3.347 | 173.4 |
| 4HY | 3JZC | I···OC(PHE272) | 3.237 | 176.1 |
| 4HY | 3JZB | I···OC(PHE218) | 3.215 | 173.7 |
| 4HY | 2PIN | I···OC(PHE272) | 3.279 | 176.4 |
| 4HY | 2PKL | I···CC(TYR834) | 3.476 | 175.8 |
| 4HY | 2PIU | I···CC(TYR834) | 3.594 | 175.1 |
| 4HY | 2PIT | I···CC(TYR834) | 3.671 | 175.1 |
| 4HY | 1NQ0 | I···OC(PHE272) | 3.329 | 175.8 |
| 4HY | 1NUO | I···OC(PHE272) | 3.691 | 176.1 |
| 4HY | 1NQ2 | I···OC(PHE272) | 3.074 | 174.4 |
| 4QL | 5B34 | I···OC(ILE222) | 3.110 | 177.3 |
| B3I | 1BKE | I···OC(ARG257) | 3.707 | 175.8 |
| I3C | 3E3S | I···OC(GLY20)  | 3.486 | 176.2 |
| I3C | 3E79 | I···OC(ALA334) | 3.040 | 161.1 |
| I3C | 3E3D | I···OC(TYR20)  | 3.004 | 162.3 |
| I3C | 3E3T | I···OC(LEU141) | 2.829 | 169.4 |
| I3C | 4NC7 | I···OC(GLU34)  | 2.110 | 167.7 |
| I3C | 4BVX | I···OC(LEU171) | 3.071 | 168.1 |
| I3C | 3Q7S | I···OC(LEU23)  | 2.791 | 177.2 |
| I3C | 5U84 | I···OC(ARG193) | 2.901 | 168.5 |
| I3C | 6EG7 | I···OC(ASP146) | 2.879 | 174.4 |
| I3C | 6MRY | I···OC(GLN3)   | 3.122 | 165.2 |
| I3C | 6NQZ | I···OC(THR74)  | 3.400 | 170.3 |
| I3C | 6QE4 | I···OC(LEU292) | 3.336 | 166.4 |
| I3C | 7JSY | I···OC(SER312) | 3.309 | 173.8 |
| T3  | 2H77 | I···OC(PHE218) | 3.118 | 176.6 |
| T3  | 4NLW | I···OC(PHE218) | 3.057 | 175.3 |
| T3  | 3VKX | I···OC(GLY127) | 3.068 | 171.1 |
| T3  | 4LNX | I···OC(PHE218) | 3.060 | 176.0 |
| T3  | 1BSX | I···OC(PHE272) | 3.325 | 175.8 |
| T3  | 3GWS | I···OC(PHE272) | 3.101 | 174.5 |
| T3  | 4ZO1 | I···OC(GLY344) | 3.107 | 162.1 |

## Cartesian coordinates of the PDB models

### 3DNA@MSE102

|    |            |            |            |
|----|------------|------------|------------|
| C  | 4.1787552  | -0.8318630 | 2.4378021  |
| C  | 3.5257552  | 0.4721370  | 1.9648021  |
| O  | 3.8027552  | 1.5461370  | 2.5028021  |
| N  | 2.6517552  | 0.3701370  | 0.9678021  |
| C  | 1.9667552  | 1.5451370  | 0.4348021  |
| C  | 1.0867552  | 2.2161370  | 1.4878021  |
| O  | 1.1217552  | 3.4381370  | 1.6468021  |
| C  | 1.1557552  | 1.1791370  | -0.8091979 |
| C  | 2.0227552  | 0.9051370  | -2.0231979 |
| Se | 0.9867552  | 0.7171370  | -3.6481979 |
| C  | 0.5617552  | 2.5801370  | -3.9891979 |
| N  | 0.3197552  | 1.4121370  | 2.2188021  |
| C  | -0.5632448 | 1.9301370  | 3.2678021  |
| C  | -3.4772448 | -1.8308630 | -0.1601979 |
| C  | -4.3512448 | -2.6668630 | 0.5358021  |
| C  | -4.8272448 | -3.8318630 | -0.0721979 |
| C  | -4.4292448 | -4.1548630 | -1.3711979 |
| C  | -3.5542448 | -3.3138630 | -2.0671979 |
| C  | -3.0762448 | -2.1498630 | -1.4591979 |
| I  | -1.7582448 | -0.8768630 | -2.4781979 |
| H  | 3.9029897  | -0.9927505 | 3.4987171  |
| H  | -0.5402563 | 3.0326664  | 3.1935926  |
| H  | 2.7194545  | 2.3239439  | 0.1929050  |
| H  | 0.4776694  | 0.3236565  | -0.6026147 |
| H  | 0.4887488  | 2.0404298  | -1.0228342 |
| H  | 2.5924994  | -0.0431694 | -1.9325065 |
| H  | 2.7701876  | 1.7107972  | -2.1783501 |
| H  | 0.9999209  | 3.2163070  | -3.1956375 |
| H  | -0.5345378 | 2.7272104  | -3.9928038 |
| H  | 0.9819466  | 2.8871936  | -4.9656326 |
| H  | -3.1076213 | -0.9096816 | 0.3169060  |
| H  | -4.6629007 | -2.4027683 | 1.5580956  |
| H  | -5.5175889 | -4.4945900 | 0.4722953  |
| H  | -4.8028117 | -5.0704689 | -1.8551864 |
| H  | -3.2460247 | -3.5704564 | -3.0921680 |
| H  | 3.9039249  | -1.7336014 | 1.8537916  |
| H  | 5.2774618  | -0.7001381 | 2.4066119  |
| H  | -1.6021143 | 1.5671126  | 3.1276481  |
| H  | -0.2100731 | 1.6327934  | 4.2777114  |
| H  | 0.4235798  | 0.4012679  | 2.1144865  |
| H  | 2.4908989  | -0.5343602 | 0.5211292  |

### 3DNA@LEU84

|   |            |            |            |
|---|------------|------------|------------|
| C | -5.2245734 | 0.2486797  | -0.5622114 |
| C | -3.8505734 | -0.4093203 | -0.6672114 |
| O | -3.5805734 | -1.1363203 | -1.6252114 |
| N | -2.9965734 | -0.1603203 | 0.3247886  |

|   |            |            |            |
|---|------------|------------|------------|
| C | -1.6205734 | -0.6603203 | 0.3087886  |
| C | -1.5035734 | -2.1353203 | 0.6897886  |
| O | -0.6675734 | -2.8533203 | 0.1367886  |
| C | -0.7185734 | 0.1846797  | 1.2197886  |
| C | -0.5695734 | 1.6816797  | 0.9207886  |
| C | 0.4784266  | 2.2966797  | 1.8387886  |
| C | -0.2235734 | 1.9296797  | -0.5472114 |
| N | -2.3345734 | -2.5763203 | 1.6317886  |
| C | -2.2595734 | -3.9463203 | 2.1517886  |
| C | 4.5644266  | -0.6023203 | -2.5492114 |
| C | 5.4994266  | 0.3416797  | -2.9792114 |
| C | 5.7134266  | 1.4986797  | -2.2322114 |
| C | 4.9944266  | 1.7136797  | -1.0572114 |
| C | 4.0574266  | 0.7746797  | -0.6272114 |
| C | 3.8424266  | -0.3833203 | -1.3752114 |
| I | 2.4394266  | -1.7933203 | -0.7312114 |
| H | -5.9931096 | -0.5489286 | -0.5783003 |
| H | -1.0527768 | 0.0481420  | 2.2749313  |
| H | 0.2883604  | -0.2843136 | 1.1665743  |
| H | -1.5444100 | 2.1848272  | 1.1305816  |
| H | -0.0566738 | 3.0083103  | -0.7446643 |
| H | 0.7059022  | 1.3877750  | -0.8280049 |
| H | -1.0262507 | 1.5870364  | -1.2311159 |
| H | 0.2468270  | 2.1235437  | 2.9107101  |
| H | 0.5623677  | 3.3916616  | 1.6834282  |
| H | 1.4784194  | 1.8530591  | 1.6418021  |
| H | -1.2574095 | -0.6284703 | -0.7380780 |
| H | -1.3623262 | -4.4133294 | 1.7061111  |
| H | 4.3971476  | -1.5161773 | -3.1384448 |
| H | 6.0637804  | 0.1638336  | -3.9074284 |
| H | 6.4516571  | 2.2431259  | -2.5684549 |
| H | 5.1604494  | 2.6249787  | -0.4620106 |
| H | 3.4914281  | 0.9470214  | 0.3007830  |
| H | -3.1514741 | -4.5411374 | 1.8625522  |
| H | -2.1719155 | -3.9442692 | 3.2576718  |
| H | -5.3843668 | 0.8668435  | -1.4670700 |
| H | -5.3783463 | 0.8796114  | 0.3370006  |
| H | -3.2412128 | 0.5375650  | 1.0297191  |
| H | -3.0782525 | -1.9542698 | 1.9534689  |

#### 4x21

|   |            |            |           |
|---|------------|------------|-----------|
| C | 0.0811085  | -3.3264682 | 5.8894747 |
| C | -0.9528915 | -2.2284682 | 5.7494747 |
| O | -1.3898915 | -1.6334682 | 6.7354747 |
| N | -1.3128915 | -1.9584682 | 4.5194747 |
| C | -2.2318915 | -0.8924682 | 4.2014747 |
| C | -3.3438915 | -1.3844682 | 3.2794747 |
| O | -3.2478915 | -2.4404682 | 2.6844747 |
| C | -1.4798915 | 0.2685318  | 3.5384747 |
| C | -0.2828915 | 0.7855318  | 4.2984747 |
| S | 0.9791085  | 1.5055318  | 3.2874747 |

|   |            |            |            |
|---|------------|------------|------------|
| C | 2.1611085  | 0.2255318  | 3.2154747  |
| N | -4.3698915 | -0.5694682 | 3.1264747  |
| C | -5.4278915 | -0.9184682 | 2.2024747  |
| C | -1.3188915 | 0.5095318  | -3.9685253 |
| C | -1.2018915 | 0.1675318  | -6.3755253 |
| N | -1.8708915 | 0.2305318  | -5.1275253 |
| N | -0.0468915 | 0.7905318  | -3.9855253 |
| C | 0.5241085  | 1.0435318  | -2.8055253 |
| C | -0.2398915 | 1.0335318  | -1.6395253 |
| I | 0.4061085  | 1.4105318  | 0.2924747  |
| C | -1.5978915 | 0.7275318  | -1.7565253 |
| N | -2.1298915 | 0.4605318  | -2.9215253 |
| C | 1.9351085  | 1.3585318  | -2.8095253 |
| C | 2.6681085  | 1.9285318  | -1.8215253 |
| N | 3.9661085  | 2.0555318  | -2.1875253 |
| C | 4.0971085  | 1.5795318  | -3.4385253 |
| C | 2.8621085  | 1.1175318  | -3.8775253 |
| C | 2.7411085  | 0.5675318  | -5.1515253 |
| C | 3.8651085  | 0.4805318  | -5.9665253 |
| C | 5.0951085  | 0.9505318  | -5.4995253 |
| C | 5.1931085  | 1.5045318  | -4.2435253 |
| H | 0.2272227  | -3.9374024 | 4.9760613  |
| H | -2.1800779 | 1.0984176  | 3.3068589  |
| H | -1.1430150 | -0.0998405 | 2.5436110  |
| H | -0.5863591 | 1.5413453  | 5.0525482  |
| H | 0.1890787  | -0.0305870 | 4.8832135  |
| H | 1.7548936  | -0.7063154 | 2.7650500  |
| H | 2.5874790  | -0.0123745 | 4.2134341  |
| H | 2.9871706  | 0.5714929  | 2.5627478  |
| H | -2.6541251 | -0.5639771 | 5.1774724  |
| H | -6.0645225 | -1.7412663 | 2.5936429  |
| H | -0.4708992 | -0.6732918 | -6.4299496 |
| H | -2.2538532 | 0.6966625  | -0.8664977 |
| H | 2.3597550  | 2.3494943  | -0.8666861 |
| H | 4.6954598  | 2.5002559  | -1.6344985 |
| H | 1.7550044  | 0.2247044  | -5.4874295 |
| H | 3.7830675  | 0.0457376  | -6.9743434 |
| H | 5.9892539  | 0.8927089  | -6.1389537 |
| H | 6.1687308  | 1.8764824  | -3.8866167 |
| H | -1.9417563 | 0.0289082  | -7.1865486 |
| H | -0.6269405 | 1.0962739  | -6.5817042 |
| H | -4.9914804 | -1.2682791 | 1.2467147  |
| H | -6.0648902 | -0.0344012 | 2.0116838  |
| H | -0.2060516 | -3.9845180 | 6.7310957  |
| H | 1.0528036  | -2.8643807 | 6.1593108  |
| H | -1.1067324 | -2.5994585 | 3.7478094  |
| H | -4.4576699 | 0.2678565  | 3.7023528  |
| H | -2.8607740 | -0.0112111 | -5.0787009 |

## 5HK2

|   |            |           |            |
|---|------------|-----------|------------|
| C | -5.5883863 | 1.1225453 | -0.3926241 |
|---|------------|-----------|------------|

|   |            |            |            |
|---|------------|------------|------------|
| C | -4.7113863 | 0.2645453  | 0.5133759  |
| O | -5.0433863 | -0.8854547 | 0.7993759  |
| N | -3.5953863 | 0.8265453  | 0.9663759  |
| C | -2.7123863 | 0.1235453  | 1.8883759  |
| C | -3.4203863 | -0.0864547 | 3.2213759  |
| O | -3.3483863 | -1.1654547 | 3.8123759  |
| C | -1.4113863 | 0.8995453  | 2.0973759  |
| C | -0.3233863 | 0.1065453  | 2.7903759  |
| C | -0.3433863 | -1.2834547 | 2.7953759  |
| C | 0.7206137  | 0.7465453  | 3.4473759  |
| C | 0.6496137  | -2.0134547 | 3.4263759  |
| C | 1.7166137  | 0.0245453  | 4.0823759  |
| C | 1.6756137  | -1.3544547 | 4.0683759  |
| O | 2.6626137  | -2.0764547 | 4.6973759  |
| N | -4.1083863 | 0.9565453  | 3.6783759  |
| C | -4.8313863 | 0.9265453  | 4.9463759  |
| C | 5.5476137  | -0.2584547 | -7.5746241 |
| C | 3.8236137  | 0.1025453  | -5.8936241 |
| C | 3.3916137  | -0.1114547 | -4.5936241 |
| C | 2.0976137  | 0.2645453  | -4.2586241 |
| C | 1.6216137  | 0.0635453  | -2.9716241 |
| C | 2.4446137  | -0.5164547 | -2.0186241 |
| C | 3.7406137  | -0.8974547 | -2.3506241 |
| C | 4.2186137  | -0.6964547 | -3.6416241 |
| N | 5.0236137  | -0.4074547 | -6.2106241 |
| O | 3.1116137  | 0.7185453  | -6.6866241 |
| I | 1.7156137  | -0.8114547 | -0.0856241 |
| H | -6.5584034 | 1.2855052  | 0.1183158  |
| H | -1.6193201 | 1.8355404  | 2.6606495  |
| H | -1.0314951 | 1.2143308  | 1.0951845  |
| H | -1.1689792 | -1.8398489 | 2.3363532  |
| H | 0.7564535  | 1.8480917  | 3.4670482  |
| H | 0.6279832  | -3.1123845 | 3.4373551  |
| H | 2.5378423  | 0.5492670  | 4.5982954  |
| H | 3.2931281  | -1.4476017 | 5.0929284  |
| H | -2.5374033 | -0.8882818 | 1.4783534  |
| H | -4.5569103 | -0.0163180 | 5.4554107  |
| H | 4.8642154  | 0.4245214  | -8.1117557 |
| H | 1.4742528  | 0.7218703  | -5.0389664 |
| H | 0.5947294  | 0.3623216  | -2.7132412 |
| H | 4.3933301  | -1.3490817 | -1.5885001 |
| H | 5.2647670  | -0.9669911 | -3.8372187 |
| H | -5.1606641 | 2.1082057  | -0.6677436 |
| H | -5.8040165 | 0.5499255  | -1.3149974 |
| H | -4.5507752 | 1.7888065  | 5.5857823  |
| H | -5.9310092 | 0.9368388  | 4.7902431  |
| H | 6.5710861  | 0.1705512  | -7.5640367 |
| H | 5.5746149  | -1.2310764 | -8.1107782 |
| H | -3.3029193 | 1.7367940  | 0.6055792  |
| H | -4.2322219 | 1.7605381  | 3.0609993  |
| H | 5.5000399  | -1.0533808 | -5.5873484 |



**3PP1**

|   |            |            |            |
|---|------------|------------|------------|
| C | -2.2994255 | -4.6424371 | -2.3078033 |
| C | -1.8304255 | -4.6964371 | -0.8718033 |
| O | -2.4734255 | -5.3364371 | -0.0348033 |
| N | -0.7064255 | -4.0364371 | -0.5918033 |
| C | -0.1844255 | -3.9164371 | 0.7721967  |
| C | -1.2204255 | -3.2664371 | 1.6921967  |
| O | -1.8654255 | -2.2724371 | 1.3371967  |
| N | -1.3804255 | -3.8594371 | 2.8681967  |
| C | -2.2964255 | -3.3534371 | 3.8731967  |
| C | 2.4665745  | 6.7955629  | -2.1048033 |
| N | 2.7435745  | 5.8415629  | -1.1388033 |
| C | 2.0235745  | 4.6815629  | -0.8258033 |
| C | 0.8865745  | 4.2695629  | -1.5238033 |
| C | 0.2145745  | 3.1015629  | -1.1608033 |
| C | 0.6445745  | 2.3205629  | -0.0808033 |
| I | -0.4014255 | 0.5535629  | 0.4741967  |
| C | 1.7825745  | 2.7445629  | 0.6151967  |
| C | 2.4735745  | 3.9085629  | 0.2511967  |
| F | 3.5735745  | 4.2915629  | 0.9481967  |
| H | -1.5680117 | -4.2187625 | -3.0254322 |
| H | 0.1254186  | -4.9162077 | 1.1456833  |
| H | -1.8351405 | -3.3929561 | 4.8806649  |
| H | -3.2458109 | -3.9309104 | 3.8894643  |
| H | 0.5209700  | 4.8691915  | -2.3692009 |
| H | -0.6766044 | 2.8023875  | -1.7333398 |
| H | 2.1718261  | 2.1765762  | 1.4739771  |
| H | -2.5379399 | -2.3059660 | 3.6143834  |
| H | -2.5661051 | -5.6687278 | -2.6237856 |
| H | -3.2275792 | -4.0375019 | -2.3509973 |
| H | -0.3210591 | -3.4020918 | -1.2911868 |
| H | -0.9556625 | -4.7756794 | 3.0167521  |
| H | 0.7109617  | -3.2648634 | 0.7410726  |
| H | 3.5208467  | 6.0181558  | -0.5054149 |
| H | 2.4560089  | 6.3838065  | -3.1450675 |
| H | 1.4799488  | 7.3087160  | -1.9671342 |
| H | 3.2409590  | 7.5865750  | -2.0886292 |
